# Supplementary material for: Genetic Diversity of Porcine Circovirus Types 2 and 3 in Wild Boar in Italy
Source: MDPI journal article supplement (doi:10.3390/ani12080953), 2022-04-07
Supplement: s1 [file s1]

**Figure S1:** The association between PCVs infection and gender tested using the  $\chi^2$  test.

|         |       | Outcome |         |         |
|---------|-------|---------|---------|---------|
|         |       | Yes     | No      | Total   |
| FEMALES | Yes   | 34      | 11      | 45      |
|         | Row % | 75,56%  | 24,44%  | 100,00% |
|         | Col % | 56,67%  | 50,00%  | 54,88%  |
| MALES   | No    | 26      | 11      | 37      |
|         | Row % | 70,27%  | 29,73%  | 100,00% |
|         | Col % | 43,33%  | 50,00%  | 45,12%  |
| Total   |       | 60      | 22      | 82      |
| Row %   |       | 73,17%  | 26,83%  | 100,00% |
| Col %   |       | 100,00% | 100,00% | 100,00% |

  

| Odds-based Parameters  |          |        |        | Statistical Tests |          |            |
|------------------------|----------|--------|--------|-------------------|----------|------------|
|                        | Estimate | Lower  | Upper  |                   | $\chi^2$ | 2 Tailed P |
| Odds Ratio             | 1,3077   | 0,4911 | 3,4822 | Uncorrected       | 0,2889   | 0,59090772 |
| MLE Odds Ratio (Mid-P) | 1,3034   | 0,4803 | 3,5447 | Mantel-Haenszel   | 0,2854   | 0,59318001 |
| Fisher-Exact           |          | 0,4363 | 3,9054 | Corrected         | 0,0824   | 0,77404714 |

  

| Risk-based Parameters |          |          |         |              | 1 Tailed P | 2 Tailed P |
|-----------------------|----------|----------|---------|--------------|------------|------------|
|                       | Estimate | Lower    | Upper   |              |            |            |
| Risk Ratio            | 1,0752   | 0,8229   | 1,4049  | Mid-P Exact  | 0,30052758 |            |
| Risk Difference       | 5,2853   | -14,0687 | 24,6392 | Fisher Exact | 0,38590412 | 0,62420310 |

**Figure S2:** The  $\chi^2$  test for trend implemented to test for a linear trend of PCVs infection over the age categories

| Analysis For Linear Trends In Proportions |   |       |          |            |
|-------------------------------------------|---|-------|----------|------------|
| Exposure Score                            |   | Cases | Controls | Odds Ratio |
| CLASS                                     | 0 | 2     | 2        | 1.000      |
| CLASS                                     | 1 | 20    | 7        | 2.857      |
| CLASS                                     | 2 | 38    | 13       | 2.923      |
|                                           |   |       |          |            |
|                                           |   |       |          |            |

Add Row

|                                                           |         |
|-----------------------------------------------------------|---------|
| Chi Square for linear trend<br>(Extended Mantel-Haenszel) | 0.46467 |
| p value                                                   | 0.49545 |

**Table S1:** List of oligonucleotides used in this study.

| Pathogen  | Assay  | Primers | Sequence (5'-3')                       | Target gene | Amplification size (bp) | Reference  |
|-----------|--------|---------|----------------------------------------|-------------|-------------------------|------------|
| PCV2/PCV3 | qPCR   | PCV2-F  | CCCTGTCACCCTGGGTGAT                    | ORF2        | 77                      | [20]       |
|           |        | PCV2-R  | CCTGTGCCCTTTGAATACTACAGA               |             |                         |            |
|           |        | PCV2-P  | FAM-TAAGGTTGAATTCTGGCCCTGCTCCC-Eclipse |             |                         |            |
|           |        | PCV3-F  | CAAGAAAGAGGGGGATTACC                   | ORF1        | 69                      | [20]       |
|           |        | PCV3-R  | GCTTGAAGATCCGATCTGG                    |             |                         |            |
|           |        | PCV3-P  | HEX-GGCGAAGATTCTCTC-MGB                |             |                         |            |
| PCV2      | PCR    | 165 F   | ACCYCACCTHCAGGGGTTGCTAA                | ORF1        | 498                     | this study |
|           |        | 662 R   | AGCCAGCCATARAAGTCATCAATA               |             |                         |            |
|           | nPCR   | 176 F   | AGGGGTTGCTAATTTTGTGAARA                | ORF1        | 451                     |            |
|           |        | 626R    | TCACCWTGTTAACCATCCCACCACT              |             |                         |            |
| PCV2      | inPCR  | 181 R   | STGCTCWGCARCGGTCACCAGACT               | ORF1        | >1500                   | this study |
|           |        | 238 F   | CGGGAAAATGCAGAAGCGTGAT                 |             |                         |            |
|           | ninPCR | 148 R   | YARCAAGGTACTCACAGCAGTAGR               |             |                         |            |
|           |        | 307 F   | AAGYAAATGGGCTGCTAATTTTGCA              |             |                         |            |
| PCV3      | PCR    | 164 F   | ATTTCAGAACAAGGCGACTCA                  | ORF1        | 448                     | this study |
|           |        | 611 R   | CCCTCCCCATTATAMCCATCCCAC               |             |                         |            |
|           | nPCR   | 175 F   | AAAAGGCGACTCAKCTCGGTGAAG               | ORF1        | 427                     |            |
|           |        | 601 R   | TATAMCCATCCCACCAAGGCC                  |             |                         |            |
| PCV3      | inPCR  | 137 R   | CGTCTCCGTCAGAATCCGAGC                  | ORF1        | >1500                   | this study |
|           |        | 193 F   | GGCGGGGTTTGCGTGATTTTT                  |             |                         |            |
|           | ninPCR | 69 R    | TCTCGAGGTAATCCCCCTCTTCT                |             |                         |            |
|           |        | 296 F   | SCGGGAAGCTTGTGMGGATGCKGC               |             |                         |            |

PCV, porcine circovirus; qPCR, real time quantitative PCR; ORF, Open Reading Frame; nPCR, nested PCR; inPCR, inverse PCR; ninPCR, nested inverse PCR

**Table S2:** PCV positive samples by quantitative real-time PCR.

| N. | Sample code | Gender | Age class | Municipality       | hunting district | PCV2 load <sup>a</sup> | PCV3 load <sup>a</sup> |
|----|-------------|--------|-----------|--------------------|------------------|------------------------|------------------------|
| 1  | 330/21      | F      | 2 ***     | ARMENTO            | ATC 3            | -                      | $1.36 \times 10^5$     |
| 2  | 331/21      | M      | 2         | ARMENTO            | ATC 3            | -                      | $4.88 \times 10^2$     |
| 3  | 332/21      | M      | 1 **      | ARMENTO            | ATC 3            | -                      | $6.35 \times 10^4$     |
| 4  | 335/21      | F      | 1         | ARMENTO            | ATC 3            | -                      | $7.88 \times 10^1$     |
| 5  | 336/21      | M      | 2         | ARMENTO            | ATC 3            | -                      | $9.15 \times 10^3$     |
| 6  | 347/21      | F      | 1         | ARMENTO            | ATC 3            | -                      | $1.18 \times 10^4$     |
| 7  | 348/21      | F      | 2         | ARMENTO            | ATC 3            | -                      | $9.75 \times 10^2$     |
| 8  | 349/21      | M      | 2         | ARMENTO            | ATC 3            | $2.37 \times 10^1$     | $2.60 \times 10^3$     |
| 9  | 350/21      | M      | 1         | ARMENTO            | ATC 3            | -                      | $9.18 \times 10^2$     |
| 10 | 351/21      | F      | 1         | ARMENTO            | ATC 3            | $2.38 \times 10^6$     | $1.12 \times 10^4$     |
| 11 | 352/21      | F      | 1         | ARMENTO            | ATC 3            | -                      | $1.78 \times 10^2$     |
| 12 | 363/21      | F      | 2         | POTENZA            | ATC 2            | -                      | $2.63 \times 10^4$     |
| 13 | 364/21      | M      | 2         | VIETRI             | ATC 2            | -                      | $2.58 \times 10^3$     |
| 14 | 366/21      | F      | 2         | ARMENTO            | ATC 3            | $4.88 \times 10^2$     | $2.57 \times 10^3$     |
| 15 | 367/21      | F      | 2         | ARMENTO            | ATC 3            | -                      | $1.19 \times 10^3$     |
| 16 | 368/21      | F      | 2         | ARMENTO            | ATC 3            | -                      | $1.09 \times 10^3$     |
| 17 | 369/21      | M      | 1         | ARMENTO            | ATC 3            | -                      | $1.91 \times 10^5$     |
| 18 | 370/21      | M      | 1         | ARMENTO            | ATC 3            | $1.25 \times 10^1$     | -                      |
| 19 | 371/21      | F      | 1         | ARMENTO            | ATC 3            | -                      | $9.96 \times 10^4$     |
| 20 | 372/21      | M      | 1         | ARMENTO            | ATC 3            | -                      | $5.58 \times 10^2$     |
| 21 | 373/21      | F      | 1         | ARMENTO            | ATC 3            | -                      | $1.91 \times 10^1$     |
| 22 | 374/21      | F      | 1         | ARMENTO            | ATC 3            | -                      | $5.13 \times 10^1$     |
| 23 | 376/21      | F      | 2         | TRIVIGNO           | ATC 2            | $1.27 \times 10^1$     | $3.17 \times 10^2$     |
| 24 | 377/21      | F      | 2         | ARMENTO            | ATC 3            | -                      | $8.30 \times 10^2$     |
| 25 | 378/21      | F      | 2         | POTENZA            | ATC 2            | $1.23 \times 10^3$     | $8.56 \times 10^3$     |
| 26 | 379/21      | M      | 2         | ACERENZA           | ATC 1            | $5.34 \times 10^3$     | $7.40 \times 10^2$     |
| 27 | 381/21      | M      | 2         | ACERENZA           | ATC 1            | -                      | $1.74 \times 10^1$     |
| 28 | 382/21      | F      | 1         | ACERENZA           | ATC 1            | $5.20 \times 10^3$     | $7.20 \times 10^2$     |
| 29 | 383/21      | F      | 1         | OPPIDO LUCANO      | ATC 3            | -                      | $2.34 \times 10^2$     |
| 30 | 384/21      | M      | 2         | ACERENZA           | ATC 1            | $2.55 \times 10^1$     | $8.81 \times 10^2$     |
| 31 | 386/21      | M      | 1         | RIONERO IN VULTURE | ATC 1            | -                      | $2.49 \times 10^5$     |
| 32 | 387/21      | M      | 1         | ARMENTO            | ATC 3            | $7.37 \times 10^1$     | $6.56 \times 10^2$     |
| 33 | 389/21      | M      | 1         | RIONERO IN VULTURE | ATC 1            | -                      | $4.50 \times 10^2$     |
| 34 | 390/21      | M      | 1         | ARMENTO            | ATC 3            | -                      | $1.63 \times 10^4$     |
| 35 | 391/21      | M      | 1         | MELFI              | ATC 1            | -                      | $5.56 \times 10^1$     |
| 36 | 394/21      | F      | 2         | ARMENTO            | ATC 3            | $5.02 \times 10^1$     | $5.06 \times 10^3$     |
| 37 | 396/21      | F      | 2         | ARMENTO            | ATC 3            | $3.69 \times 10^1$     | $4.68 \times 10^2$     |
| 38 | 397/21      | F      | 1         | ARMENTO            | ATC 3            | $2.03 \times 10^3$     | -                      |
| 39 | 399/21      | F      | 2         | ARMENTO            | ATC 3            | -                      | $1.88 \times 10^2$     |
| 40 | 400/21      | F      | 2         | ARMENTO            | ATC 3            | -                      | $3.44 \times 10^4$     |
| 41 | 401/21      | M      | 2         | ARMENTO            | ATC 3            | -                      | $2.76 \times 10^4$     |
| 42 | 402/21      | F      | 2         | MONTEMURRO         | ATC 3            | $3.36 \times 10^1$     | $1.86 \times 10^2$     |
| 43 | 403/21      | F      | 2         | ARMENTO            | ATC 3            | -                      | $6.01 \times 10^2$     |
| 44 | 406/21      | M      | 2         | ARMENTO            | ATC 3            | -                      | $2.61 \times 10^2$     |
| 45 | 407/21      | F      | 2         | ARMENTO            | ATC 3            | $1.27 \times 10^1$     | $2.53 \times 10^3$     |
| 46 | 408/21      | F      | 2         | GUARDIA PERTICARIA | ATC 3            | -                      | $9.58 \times 10^1$     |
| 47 | 410/21      | F      | 2         | GENZANO DI LUCANIA | ATC 1            | $8.08 \times 10^2$     | $1.19 \times 10^4$     |
| 48 | 412/21      | M      | 2         | ARMENTO            | ATC 3            | -                      | $2.61 \times 10^2$     |
| 49 | 413/21      | F      | 2         | ARMENTO            | ATC 3            | $8.42 \times 10^4$     | $5.03 \times 10^3$     |

|    |          |   |     |               |       |                    |                    |
|----|----------|---|-----|---------------|-------|--------------------|--------------------|
| 50 | 415/21   | M | 2   | ARMENTO       | ATC 3 | $2.95 \times 10^6$ | $2.53 \times 10^1$ |
| 51 | 432/21   | M | 2   | AVGLIANO      | ATC 2 | $2.03 \times 10^1$ | $7.93 \times 10^4$ |
| 52 | 434/21   | F | 2   | ACERENZA      | ATC 1 | $3.02 \times 10^3$ | $6.99 \times 10^3$ |
| 53 | 436/21   | F | 2   | ACERENZA      | ATC 1 | -                  | $9.75 \times 10^2$ |
| 54 | 459/21   | M | 2   | ACERENZA      | ATC 1 | $2.82 \times 10^3$ | $1.35 \times 10^4$ |
| 55 | 476/21   | F | 2   | AVGLIANO      | ATC 2 | $9.30 \times 10^2$ | $5.02 \times 10^4$ |
| 56 | 477/21   | F | 2   | AVGLIANO      | ATC 2 | -                  | $2.07 \times 10^5$ |
| 57 | 478/21   | M | 2   | FORENZA       | ATC 1 | -                  | $4.52 \times 10^3$ |
| 58 | 479/21   | M | 2   | FORENZA       | ATC 1 | -                  | $5.74 \times 10^4$ |
| 59 | 499/21-1 | F | 0 * | OPPIDO LUCANO | ATC 1 | -                  | $5.13 \times 10^1$ |
| 60 | 499/21-3 | M | 0   | OPPIDO LUCANO | ATC 1 | -                  | $1.50 \times 10^1$ |

\* Juveniles (<12 months of age); \*\* Subadults (>12 months and <24 months); \*\*\* Adults (>24 months); M, male; F, female; <sup>a</sup> Viral loads are expressed as DNA genome copies/mL; ATC, Ambito Territoriale di Caccia

**Table S3:** Interrogation (BLAST) of NCBI nucleotide database (February 2022) of the partial (500nt) ORF1 (replicase) sequence of porcine circovirus (PCV) strains generated in this study

| N. | Strain       | Identity to reference sequences |                               |              |
|----|--------------|---------------------------------|-------------------------------|--------------|
|    |              | PCV species                     | PCV strain (accession nr.)    | nt identity% |
| 1  | ITA/2021/330 | PCV3                            | SAR1 (MN781187)               | 99.5         |
| 2  | ITA/2021/332 | PCV3                            | SAR1 (MN781187)               | 99.3         |
| 3  | ITA/2021/336 | PCV3                            | Sichuan-2020 (MZ449244)       | 99.8         |
| 4  | ITA/2021/347 | PCV3                            | WB20GG/2020 (MW287998)        | 100          |
| 5  | ITA/2021/351 | PCV2                            | Krasnoyarskiy_2018 (MZ511703) | 99.5         |
| 6  | ITA/2021/363 | PCV3                            | WB20GG/2020 (MW287998)        | 98.3         |
| 7  | ITA/2021/364 | PCV3                            | K-2018-1 (MN698819)           | 98.8         |
| 8  | ITA/2021/369 | PCV3                            | HuN-CS (MG897478)             | 99.6         |
| 9  | ITA/2021/371 | PCV3                            | HuN-CS (MG897478)             | 99.7         |
| 10 | ITA/2021/378 | PCV3                            | Nanning2880/2006 (MK814116)   | 86           |
| 11 | ITA/2021/382 | PCV2                            | serum004 (MH287045)           | 99.5         |
| 12 | ITA/2021/386 | PCV3                            | Nanjing 2017 (MK580468)       | 100          |
| 13 | ITA/2021/390 | PCV3                            | HeNYS-2 (MH184540)            | 97.7         |
| 14 | ITA/2021/394 | PCV3                            | WB20GG/2020 (MW287998)        | 100          |
| 15 | ITA/2021/397 | PCV2                            | V0622 (KJ128269)              | 100          |
| 16 | ITA/2021/400 | PCV3                            | WB20GG/2020 (MW287998)        | 99           |
| 17 | ITA/2021/401 | PCV3                            | SAR1 (MN781187)               | 100          |
| 18 | ITA/2021/410 | PCV3                            | Sichuan-2020 (MZ449244)       | 99.5         |
| 19 | ITA/2021/413 | PCV2                            | Krasnoyarskiy_2018 (MZ511703) | 99.5         |
| 20 | ITA/2021/415 | PCV2                            | Krasnoyarskiy_2018 (MZ511703) | 99.2         |
| 21 | ITA/2021/432 | PCV3                            | SH11 (MN788148)               | 97.3         |
| 22 | ITA/2021/434 | PCV2                            | 71b_Vicenza_36_ (KP231135)    | 88.8         |
| 23 | ITA/2021/459 | PCV3                            | 1776D/2017 (MG550107)         | 100          |
| 24 | ITA/2021/476 | PCV3                            | SW7_5 (MN583565)              | 99.5         |
| 25 | ITA/2021/477 | PCV3                            | SH11 (MN788148)               | 97.2         |
| 26 | ITA/2021/478 | PCV3                            | Guizhou-2020 (MZ449237)       | 85.5         |
| 27 | ITA/2021/479 | PCV3                            | Sichuan-2020 (MZ449244)       | 100          |

**Table S4:** Genomic features of complete genomes of porcine circoviruses (PCVs) sequenced in this study.

| Genotype | Sample ID    | Accession | Size (nt) | Putative Rep |     | Putative Cap |     | 5' intergenic region (nt) | 3' intergenic region (nt) | Loop motif (5'-3') | Identity to reference sequences |               | Subtype |
|----------|--------------|-----------|-----------|--------------|-----|--------------|-----|---------------------------|---------------------------|--------------------|---------------------------------|---------------|---------|
|          |              |           |           | nt           | aa  | nt           | aa  |                           |                           |                    | PCV strain ** (accession nr.)   | nt identity % |         |
| PCV2     | ITA/2021/351 | OM818366  | 1767      | 945          | 315 | 705          | 236 | 34                        | 83                        | AAGTATTAC          | Krasnoyarskiy_2018 (MZ511703)   | 99.8          | d       |
|          | ITA/2021/382 | OM818367  | 1767      | 945          | 315 | 705          | 236 | 34                        | 83                        | AAGTATTAC          | serum004 (MH287045)             | 99.6          | d-2     |
|          | ITA/2021/397 | OM818368  | 1767      | 945          | 315 | 705          | 236 | 34                        | 83                        | AAGTATTAC          | V0622 (KJ128269)                | 99.5          | b       |
|          | ITA/2021/413 | OM818369  | 1767      | 945          | 315 | 705          | 236 | 34                        | 83                        | AAGTATTAC          | Krasnoyarskiy_2018 (MZ511703)   | 99.9          | d       |
|          | ITA/2021/415 | OM818370  | 1767      | 945          | 315 | 705          | 236 | 34                        | 83                        | AAGTATTAC          | Krasnoyarskiy_2018 (MZ511703)   | 99.5          | d       |
| PCV3     | ITA/2021/330 | OM818371  | 2000      | 891 *        | 297 | 645          | 215 | 229                       | 235                       | TAGTATTAC          | SAR1 (MN781187)                 | 99.7          | 2a      |
|          | ITA/2021/369 | OM818372  | 2000      | 891 *        | 297 | 645          | 215 | 229                       | 235                       | TAGTATTAC          | HuN-CS (MG897478)               | 99.6          | 2a      |
|          | ITA/2021/371 | OM818373  | 2000      | 891 *        | 297 | 645          | 215 | 229                       | 235                       | TAGTATTAC          | HuN-CS (MG897478)               | 99.7          | 2a      |
|          | ITA/2021/386 | OM818374  | 2000      | 891 *        | 297 | 645          | 215 | 229                       | 235                       | TAGTATTAC          | Nanjing 2017 (MK580468)         | 99.5          | 2a      |
|          | ITA/2021/432 | OM818375  | 2000      | 891 *        | 297 | 645          | 215 | 229                       | 235                       | TAGTATTAC          | SH11 (MN788148)                 | 97.3          | 2a      |
|          | ITA/2021/477 | OM818376  | 2000      | 891 *        | 297 | 645          | 215 | 229                       | 235                       | TAGTATTAC          | SH11 (MN788148)                 | 97.2          | 2a      |

nt, nucleotides; aa, amminoacids; \* alternative start codon (GTC); \*\* genome sequence with the highest identity on interrogation of GenBank database with BLAST

**Table S5:** Nucleotide identity between porcine circovirus 3 (PCV3) strains based on the overall genome.

|                             | PCV3-1    | PCV3-2a   | PCV3-2b   | PCV3-3a   | PCV3-3b   | PCV3-3c   | PCV3-3d   | PCV3-3e   | PCV3-3f   | PCV3-3g   | PCV3-3h   | ITA/2021/4<br>32 | ITA/2021/4<br>77 | CHN/2006/<br>Hunan2 |
|-----------------------------|-----------|-----------|-----------|-----------|-----------|-----------|-----------|-----------|-----------|-----------|-----------|------------------|------------------|---------------------|
| <b>PCV3-1</b>               | 99.0–99.8 | 97.7–98.5 | 97.8–98.4 | 97.9–98.4 | 97.7–98.5 | 97.7–98.4 | 97.9–98.4 | 97.9–98.4 | 97.8–98.4 | 98.2–98.6 | 97.7–98.3 | 95.8–96.3        | 95.5–95.9        | 91.9–92.5           |
| <b>PCV3-2a</b>              | 97.7–98.5 | 98.7–99.7 | 98.1–98.6 | 97.8–98.4 | 97.8–98.4 | 97.6–98.3 | 97.8–98.5 | 97.7–98.3 | 97.6–98.2 | 97.5–98.3 | 97.6–98.2 | 96.8–97.3        | 96.6–97.2        | 91.0–91.6           |
| <b>PCV3-2b</b>              | 97.8–98.4 | 98.1–98.6 | 99.4–100  | 98.2–99.2 | 98.1–99.0 | 97.9–98.9 | 97.8–98.8 | 97.7–98.8 | 97.6–98.9 | 97.6–98.8 | 97.6–98.7 | 96.9–97.1        | 96.6–96.8        | 91.5–91.7           |
| <b>PCV3-3a</b>              | 97.9–98.4 | 97.8–98.4 | 98.2–99.2 | 99.2–99.4 | 98.3–99.0 | 98.1–98.9 | 98.0–98.8 | 97.9–98.6 | 97.8–98.6 | 97.6–98.5 | 97.6–98.5 | 96.9–97.0        | 96.7–97.8        | 91.1–91.5           |
| <b>PCV3-3b</b>              | 97.7–98.5 | 97.8–98.4 | 98.1–99.0 | 98.3–99.0 | 99.3–99.9 | 98.2–98.9 | 98.1–98.9 | 97.9–98.8 | 97.8–98.8 | 97.6–98.7 | 97.6–98.7 | 96.7–97.1        | 96.5–96.8        | 91.3–91.8           |
| <b>PCV3-3c</b>              | 97.7–98.4 | 97.6–98.3 | 97.9–98.9 | 98.1–98.9 | 98.2–98.9 | 99.0–99.2 | 98.2–98.7 | 97.9–98.8 | 97.8–98.8 | 97.6–98.7 | 97.6–98.7 | 96.5–96.8        | 96.3–96.7        | 90.4–91.3           |
| <b>PCV3-3d</b>              | 97.9–98.4 | 97.8–98.5 | 97.8–98.8 | 98.0–98.8 | 98.1–98.9 | 98.2–98.7 | 99.3–99.8 | 98.1–99.1 | 98.0–98.0 | 97.9–98.8 | 97.9–98.7 | 96.7–97.0        | 96.5–96.8        | 91.3–91.7           |
| <b>PCV3-3e</b>              | 97.9–98.4 | 97.7–98.3 | 97.7–98.8 | 97.9–98.6 | 97.9–98.8 | 97.9–98.8 | 98.1–99.1 | 99.4–99.7 | 98.2–99.0 | 98.1–98.8 | 97.8–98.7 | 97.0–97.1        | 96.7–96.9        | 91.3–91.4           |
| <b>PCV3-3f</b>              | 97.8–98.4 | 97.6–98.2 | 97.6–98.9 | 97.8–98.6 | 97.8–98.8 | 97.8–98.8 | 98.0–98.0 | 98.2–99.0 | 99.3–99.8 | 98.3–99.1 | 98.2–98.9 | 96.8–97.0        | 96.5–96.7        | 91.1–91.5           |
| <b>PCV3-3g</b>              | 98.2–98.6 | 97.5–98.3 | 97.6–98.8 | 97.6–98.5 | 97.6–98.7 | 97.6–98.7 | 97.9–98.8 | 98.1–98.8 | 98.3–99.1 | 99.6–99.8 | 98.2–99.2 | 97.0–97.1        | 96.8–96.9        | 91.4–91.5           |
| <b>PCV3-3h</b>              | 97.7–98.3 | 97.6–98.2 | 97.6–98.7 | 97.6–98.5 | 97.6–98.7 | 97.6–98.7 | 97.9–98.7 | 97.8–98.7 | 98.2–98.9 | 98.2–99.2 | 99.0–99.6 | 96.7–97.0        | 96.5–96.8        | 91.1–91.3           |
| <b>ITA/2021/4<br/>32</b>    | 95.8–96.3 | 96.8–97.3 | 96.9–97.1 | 96.9–97.0 | 96.7–97.1 | 96.5–96.8 | 96.7–97.0 | 97.0–97.1 | 96.8–97.0 | 97.0–97.1 | 96.7–97.0 | -                | 95.6             | 89.6                |
| <b>ITA/2021/4<br/>77</b>    | 95.5–95.9 | 96.6–97.2 | 96.6–96.8 | 96.7–97.8 | 96.5–96.8 | 96.3–96.7 | 96.5–96.8 | 96.7–96.9 | 96.5–96.7 | 96.8–96.9 | 96.5–96.8 | 95.6             | -                | 89.6                |
| <b>CHN/2006/<br/>Hunan2</b> | 91.9–92.5 | 91.0–91.6 | 91.5–91.7 | 91.1–91.5 | 91.3–91.8 | 90.4–91.3 | 91.3–91.7 | 91.3–91.4 | 91.1–91.5 | 91.4–91.5 | 91.1–91.3 | 89.6             | 89.6             | -                   |
